# Supplementary material
Source: publisher figshare collection journal article supplement (https://gsajournals.figshare.com/ndownloader/files/25117052)
Supplement: Supplementary file 1 [file 25117052]

## Sheet: Sheet1
Marker Names	Number.Probes	Target.Construct	Good.Probes	Ind.Probes	Report.Code	Seed Sequences
ZZAmpR	9	Ampicilin Resistance	0	9		NG_050235.2, KT364744.2, KX127046.1
ZZblastR	8	Blasticydin Resistance	6	5	BlastR	KF035118.1, HQ644134.1, MN996859.1
ZZbpA	8	Bovine poly-A	8	4	bpA	LT727396.1, LT727265.1, LT727183.1, LT727445.1, LT727397.1, LT727337.1
ZZCAG	9	CAG promoter element	7	9	CMV-a (2), CMV-b (5)	KX589554.1, LT727518.1, LT727221.1, LT727255.1, KY499146.1, LT727445.1
ZZCas9	7	Cas9	7	7	cas9	KY574493.1, LC169509.1, LC169507.1
ZZCE1O	7	ColE1 ORI	0	7		MH029778.1, LC379924.1
ZZchloR	10	Chloramphenicol Resistance	9	10	chloR	LC221347.1, LC221318.1, KY434118.1, KX273378.1, LT727549.1, LT727525.1
ZZcHS4	7	Chicken HS4 insulator	0	3		KP408214.1, KM486931.1, KM86922.1, KP408214.1, KM519785.1, KM486925.1
ZZCMV	10	Cytomegalovirus promoter	10	6	CMV-a (3), CMV-b (5)	KY499148.1, KY499147.1, LT727518.1, KY608739.1, LT615369.1, KX001782.1
ZZcre00011	9	Cre Recombinase	9	9	Cre	AB542060.1, KP159516.1, LM997377.1, KP159516.1, LC041121.1, KJ912898.1
ZZcreERT02	8	Cre Enhanced Replication	6	4	Cre	AB542060.1, KP159515.1, KJ912898.1, LT742529.1, LT727459.1, LC122351.1
ZZDTA00011	11	Diptheria Toxin A	11	11	DTA	AF090452.1, KX703000.1, LC085660.1, KX703000.1, LC085658.1, HM357235.1
ZZECFP0007	10	Enhanced Cyan Fluorescent Protein	10	10	g_FP	LC221313.1, AB830543.1, KU727284.1, KT878729.1
ZZEF100015	6	EF1a	0	2		LT727442.1, LT727128.1, LT727084.1
ZZegfp0015	6	Enhanced Green Fluorescent Protein	6	6	g_FP	LC221319.1, KY313416.1, KX548904.1, KY129798.1, KX349734.1, AB830544.1, KU963526.1
ZZemcIRES9	7	EMC virus Internal Ribosomal Entry Site	6	7	IRES	AB691599.1, KX757255.1, KX757250.1
ZZEYFP0013	4	Enhanced Yellow Fluorescent Protein	3	4	g_FP	LC221319.1, KY053834.1, KX001778.1, LC221320.1, KU727286.1, KU705395.1
ZZF1O00010	7	F1 ORI	0	7		LT727128.1, KY924486.1
ZZfirluc01	10	Firefly Luciferase	8	10	Luc	MN519522.1, MN728543.1, MK450605.1
ZZFlp00009	7	Flp recombinanse	0	7		KR997561.1, KY352418.1
ZZGLuc0001	8	Gaussia Luciferase	0	8		MG786372.1, MG786368.1
ZZhygro020	10	Hygromycin Resistance	0	6		LT545994.1, LT545993.1, AJ438947.1, LT545993.1, KX863719.1, KX709879.1
ZZicre0009	11	Inducible CRE Recombinase	8	11	iCre	KF753697.1, KC800700.1, AY056050.1
ZZKanR0010	6	Kanamycin Resistance	0	6		LC257597.1, JQ436536.1
ZZlacZ0003	11	LacZ module	0	7		LC221392.1, LC221318.1, KX757040.1
ZZluci0007	7	Luciferase	2	7	Luc	KY434118.1, LC171779.1, KU747013.1
ZZmcherr11	9	Mcherry	1	5	r_FP	LC221387.1, LC221315.1, KY067205.1, KX446949.1
ZZneo00018	10	Neomycin	0	7		KX714577.1, KX272607.1, LC215276.1, LC221337.1
ZZneoR0001	9	Neomycin Resistance	0	7		MT267334.1, MT267328.1, MT267317.1
ZZPU000010	7	pUC ORI	0	7		MG840312.1, MH282427.1
ZZrtTA2S10	8	Reversed Tetracyclin Transactivator	8	4	rtTa	KY053478.1, LT009447.1
ZZSV400019	18	SV40 expression	18	18	SV40	LT727634.1, LT727602.1, LT727495.1, LT727527.1,
ZZtdToma20	4	tdTomato	4	4	r_FP	LC128718.1, LT009446.1, KT878736.1, LT009456.1
ZZTetO0010	9	Tet-On	0	9		KX685167.1, KX499660.1, LT727632.1, LT727447.1, LT727433.1
ZZTK000004	3	Human Herpesvirus TK promoter	2	3	hTK_pr	KX791989.1, KX791821.1
ZZtTA00017	16	Tetracyclin Transactivator	14	16	tTA	LT726877.1, KX685167.1, KX607110.1, LT726877.1
